# Supplementary material for: More replenishment than priming loss of soil organic carbon with additional carbon input
Source: PubMed Central journal article supplement (PMC6085371; doi:10.1038/s41467-018-05667-7), 2018-08-09
Supplement: 41467_2018_5667_MOESM3_ESM.pdf [file 41467_2018_5667_MOESM3_ESM.pdf]

## **Description of Additional Supplementary Files**

File Name: Supplementary Data 1

Description: Summary of the collected data. Ecosystem type, soil sample location, country, type of added substrate, soil organic carbon content, amount of added carbon and nitrogen-to-carbon ratio of added substrate are provided.

File Name: Supplementary Data 2

Description: Details of the collected data. Time series of CO<sub>2</sub> emissions from soil organic carbon and added substrate are provided.

File Name: Supplementary Data 3

Description: Maximum Likelihood Estimates (MLEs) of calibrated parameters of the conventional model.

File Name: Supplementary Data 4

Description: Maximum Likelihood Estimates (MLEs) of calibrated parameters of the interactive model.

File Name: Supplementary Data 5

Description: Maximum Likelihood Estimates (MLEs) of calibrated parameters of the regular Michaelis-Menten model.

File Name: Supplementary Data 6

Description: Maximum Likelihood Estimates (MLEs) of calibrated parameters of the reverse Michaelis-Menten model.
